# Supplementary material for: Efficacy of Fecal Microbiota Transplant on Behavioral and Gastrointestinal Symptoms in Pediatric Autism: A Systematic Review
Source: MDPI journal article supplement (doi:10.3390/microorganisms11030806), 2023-03-22
Supplement: s1 [file s1]

**Supplemental Table S1: Assessing Risk of Bias for Observational Cohort Studies with Newcastle-Ottawa Scale**

|                                                                                               | Pan 2022 [20] | Zhang 2022 [21] |
|-----------------------------------------------------------------------------------------------|---------------|-----------------|
| <b>Selection</b>                                                                              |               |                 |
| 1. Representativeness of the exposed cohort (Truly or somewhat)                               | *             | *               |
| 2. Selection of the non-exposed cohort (drawn from the same community as the exposed cohort ) | No            | *               |
| 3. Ascertainment of exposure (secure record or structured interview)                          | *             | *               |
| 4. Demonstration that outcome of interest was not present at start of study (yes)             | *             | *               |
| <b>Comparability</b>                                                                          |               |                 |
| 5. Study controls for underlying GI issues (IBD, Celiac)                                      | *             | *               |
| 6. Study controls for underlying brain malformation                                           | *             | *               |
| <b>Outcome</b>                                                                                |               |                 |
| 7. Assessment of outcome (independent blind assessment or record linkage)                     | *             | *               |
| 8. Was follow-up long enough for outcomes to occur (yes)                                      | *             | *               |
| 9. Adequacy of follow up of cohorts (complete)                                                | *             | *               |
| <b>Total *</b>                                                                                | 8             | 9               |
| Score 7-9 high quality, 4-6 moderate risk of bias, 0-3 high risk of bias.                     | High          | High            |

**Supplemental Table S2: Assessing Quality of Nonrandomized Studies Using Risk of Bias in Non-Randomized Studies of Interventions (ROBINS-I) Scale**

|                   |                                                    | Kang 2017 [19] | Li 2021 [13] |
|-------------------|----------------------------------------------------|----------------|--------------|
| <b>Selection</b>  |                                                    |                |              |
| Pre Intervention  | Bias Due to Confounding                            | High           | High         |
|                   | Bias in Selection of Participants into the Study   | High           | High         |
| At Intervention   | Bias in Classification of Interventions            | Low            | Low          |
|                   | Bias Due to Deviations from Intended Interventions | High           | Low          |
| Post Intervention | Bias Due to Missing Data                           | High           | Low          |
|                   | Bias in Measurement of Outcomes                    | Low            | Low          |
|                   | Bias in Selection of the Reported Result           | High           | High         |
|                   | Overall Risk-of-Bias                               | High           | High         |

**Supplemental Table S3: Summary of Excluded Studies**

| Author, year         | Title                                                                                                                                                                                                                | Reason   |
|----------------------|----------------------------------------------------------------------------------------------------------------------------------------------------------------------------------------------------------------------|----------|
|                      | AASLD 2020 Abstracts                                                                                                                                                                                                 | Abstract |
|                      | AASLD 2020 Abstracts                                                                                                                                                                                                 | Abstract |
| Li 2019              | Efficacy analysis of fecal microbiota transplantation in the treatment of 2010 patients with intestinal disorders                                                                                                    | Adult    |
| Ding 2019            | Long-Term Safety and Efficacy of Fecal Microbiota Transplant in Active Ulcerative Colitis                                                                                                                            | Adult    |
| Bloom 2022           | Fecal microbiota transplant improves cognition in hepatic encephalopathy and its effect varies by donor and recipient                                                                                                | Adult    |
| Mendelsohn 2022      | Fecal Microbiota Transplantation Is Safe for Clostridioides difficile Infection in Patients with Solid Tumors Undergoing Chemotherapy                                                                                | Adult    |
| Meighani 2020        | Fecal Microbiota Transplantation for Clostridioides Difficile Infection in Patients with Chronic Liver Disease                                                                                                       | Adult    |
| Yang 2020            | Potential role of intestinal microflora in disease progression among patients with different stages of Hepatitis B                                                                                                   | Adult    |
| Dai 2019             | Rescue fecal microbiota transplantation for antibiotic-associated diarrhea in critically ill patients                                                                                                                | Adult    |
| Li 2022              | Restoration of the gut microbiota is associated with a decreased risk of hepatic encephalopathy after TIPS                                                                                                           | Adult    |
| Torres 2018          | Recurrent Relatively Resistant Salmonella infantis Infection in 2 Immunocompromised Hosts Cleared With Prolonged Antibiotics and Fecal Microbiota Transplantation                                                    | Adult    |
| Mehta 2018           | Preliminary experience with single fecal microbiota transplant for treatment of recurrent overt hepatic encephalopathy-A case series                                                                                 | Adult    |
| Niccum 2018          | Zinc Deficiency and the Recurrence of Clostridium difficile Infection after Fecal Microbiota Transplant: A Retrospective Cohort Study                                                                                | Adult    |
| Chin 2017            | Fecal Microbiota Transplantation for Recurrent Clostridium difficile Infection in Patients With Inflammatory Bowel Disease: A Single-Center Experience                                                               | Adult    |
| Furuya-Kanamori 2017 | Upper Versus Lower Gastrointestinal Delivery for Transplantation of Fecal Microbiota in Recurrent or Refractory Clostridium difficile Infection: A Collaborative Analysis of Individual Patient Data From 14 Studies | Adult    |
| Park 2017            | Perceptions of fecal microbiota transplantation for Clostridium difficile infection: factors that predict acceptance                                                                                                 | Adult    |
| Youngster 2016       | Oral, frozen fecal microbiota transplant (FMT) capsules for recurrent Clostridium difficile infection                                                                                                                | Adult    |
| Pakyz 2016           | Fecal microbiota transplantation for recurrent Clostridium difficile infection: The patient experience                                                                                                               | Adult    |
| Gu 2016              | Identification of key taxa that favor intestinal colonization of Clostridium difficile in an adult Chinese population                                                                                                | Adult    |
| Wei 2015             | Fecal microbiota transplantation restores dysbiosis in patients with methicillin resistant Staphylococcus aureus enterocolitis                                                                                       | Adult    |
| Cui 2015             | Fecal microbiota transplantation through mid-gut for refractory Crohn's disease: safety, feasibility, and efficacy trial results                                                                                     | Adult    |
| Youngster 2014       | Oral, capsulized, frozen fecal microbiota transplantation for relapsing Clostridium difficile infection                                                                                                              | Adult    |
| Youngster 2014       | Fecal microbiota transplant for relapsing Clostridium difficile infection using a frozen inoculum from unrelated donors: a randomized, open-label, controlled pilot study                                            | Adult    |
| Rubin 2013           | Fecal microbiome transplantation for recurrent Clostridium difficile infection: report on a case series                                                                                                              | Adult    |
| Okahara 2020         | Matching between Donors and Ulcerative Colitis Patients Is Important for Long-Term Maintenance after Fecal Microbiota Transplantation                                                                                | Adult    |
| Li 2020              | Fecal Microbiota Transplantation for Ulcerative Colitis: The Optimum Timing and Gut Microbiota as Predictors for Long-Term Clinical Outcomes                                                                         | Adult    |

|                     |                                                                                                                                                                                                                                                    |              |
|---------------------|----------------------------------------------------------------------------------------------------------------------------------------------------------------------------------------------------------------------------------------------------|--------------|
| Pringle 2019        | Patients With Cirrhosis Require More Fecal Microbiota Capsules to Cure Refractory and Recurrent Clostridium difficile Infections                                                                                                                   | Adult        |
| Brittnacher 2016    | GUTSS: An Alignment-Free Sequence Comparison Method for Use in Human Intestinal Microbiome and Fecal Microbiota Transplantation Analysis                                                                                                           | Adult        |
| Gama 2021           | Immunologic biomarkers, morbidity and mortality among HIV patients hospitalised in a Tertiary Care Hospital in the Brazilian Amazon                                                                                                                | Adult        |
| Cheng 2021          | Fecal Microbiota Transplantation Is Safe and Effective in Patients With Clostridioides difficile Infection and Cirrhosis                                                                                                                           | Adult        |
| Kelly 2021          | Fecal Microbiota Transplantation Is Highly Effective in Real-World Practice: Initial Results From the FMT National Registry                                                                                                                        | Adult        |
| Burlew 2018         | Impact of Amoxicillin-Clavulanate followed by Autologous Fecal Microbiota Transplantation on Fecal Microbiome Structure and Metabolic Potential                                                                                                    | Adult        |
| Tvede 2015          | Rectal bacteriotherapy for recurrent Clostridium difficile-associated diarrhoea: Results from a case series of 55 patients in Denmark 2000-2012                                                                                                    | Adult        |
| Kump 2013           | Alteration of intestinal dysbiosis by fecal microbiota transplantation does not induce remission in patients with chronic active ulcerative colitis                                                                                                | Adult        |
| Cao 2017            | Dysbiosis contributes to chronic constipation development via regulation of serotonin transporter in the intestine                                                                                                                                 | Animal Study |
| Stevens 2022        | The balance between protective and pathogenic immune responses to pneumonia in the neonatal lung is enforced by gut microbiota                                                                                                                     | Animal Study |
| Hui 2022            | Donor-dependent fecal microbiota transplantation efficacy against necrotizing enterocolitis in preterm pigs                                                                                                                                        | Animal Study |
| Pearson 2022        | IgM-associated gut bacteria in obesity and type 2 diabetes in C57BL/6 mice and humans                                                                                                                                                              | Animal Study |
| Yan 2022            | Intestinal toxicity of micro- and nano-particles of foodborne titanium dioxide in juvenile mice: Disorders of gut microbiota-host co-metabolites and intestinal barrier damage                                                                     | Animal Study |
| Li 2022             | Fecal transplantation can alleviate tic severity in a Tourette syndrome mouse model by modulating intestinal flora and promoting serotonin secretion                                                                                               | Animal Study |
| Brunse 2022         | Fecal filtrate transplantation protects against necrotizing enterocolitis                                                                                                                                                                          | Animal Study |
| Zhang 2022          | Gut microbiota dysbiosis promotes age-related atrial fibrillation by lipopolysaccharide and glucose-induced activation of NLRP3-inflammasome                                                                                                       | Animal Study |
| Yang 2022           | Human Fecal Microbiota Transplantation Reduces the Susceptibility to Dextran Sulfate Sodium-Induced Germ-Free Mouse Colitis                                                                                                                        | Animal Study |
| Mu 2022             | Seizure modulation by the gut microbiota and tryptophan-kynurenine metabolism in an animal model of infantile spasms                                                                                                                               | Animal Study |
| Kim 2022            | Maternal gut bacteria drive intestinal inflammation in offspring with neurodevelopmental disorders by altering the chromatin landscape of CD4 + T cells                                                                                            | Animal Study |
| He 2021             | Colonization of fecal microbiota from patients with neonatal necrotizing enterocolitis exacerbates intestinal injury in germfree mice subjected to necrotizing enterocolitis-induction protocol via alterations in butyrate and regulatory T cells | Animal Study |
| Lin 2021            | Multiomics Study Reveals Enterococcus and Subdoligranulum Are Beneficial to Necrotizing Enterocolitis                                                                                                                                              | Animal Study |
| Hiltunen 2021       | Preterm infant meconium microbiota transplant induces growth failure, inflammatory activation, and metabolic disturbances in germ-free mice                                                                                                        | Animal Study |
| Han 2021            | Bifidobacterium infantis Maintains Genome Stability in Ulcerative Colitis via Regulating Anaphase-Promoting Complex Subunit 7                                                                                                                      | Animal Study |
| Wang 2021           | Influences of non-IgE-mediated cow's milk protein allergy-associated gut microbial dysbiosis on regulatory T cell-mediated intestinal immune tolerance and homeostasis                                                                             | Animal Study |
| Gozalbo-Rovira 2021 | Microbiota Depletion Promotes Human Rotavirus Replication in an Adult Mouse Model                                                                                                                                                                  | Animal Study |
| Liu 2021            | Gut microbiota mediates cognitive impairment in young mice after multiple neonatal exposures to sevoflurane                                                                                                                                        | Animal Study |
| Yu 2021             | $\beta$ -Sitosterol Ameliorates Endometrium Receptivity in PCOS-Like Mice: The Mediation of Gut Microbiota                                                                                                                                         | Animal Study |
| Li 2021             | Icariin enhances youth-like features by attenuating the declined gut microbiota in the aged mice                                                                                                                                                   | Animal Study |

|                   |                                                                                                                                                                                                  |              |
|-------------------|--------------------------------------------------------------------------------------------------------------------------------------------------------------------------------------------------|--------------|
| Xi 2021           | Microbiome-metabolomic analyses of the impacts of dietary stachyose on fecal microbiota and metabolites in infants intestinal microbiota-associated mice                                         | Animal Study |
| Xiao 2021         | Fecal Microbiome Transplantation from Children with Autism Spectrum Disorder Modulates Tryptophan and Serotonergic Synapse Metabolism and Induces Altered Behaviors in Germ-Free Mice            | Animal Study |
| Qi 2021           | A Novel and Reliable Rat Model of Autism                                                                                                                                                         | Animal Study |
| Amenyogbe 2021    | Biogeography of the Relationship between the Child Gut Microbiome and Innate Immune System                                                                                                       | Animal Study |
| Brunse 2021       | Enteral broad-spectrum antibiotics antagonize the effect of fecal microbiota transplantation in preterm pigs                                                                                     | Animal Study |
| Zhao 2020         | Restraining the TiO <sub>2</sub> nanoparticles-induced intestinal inflammation mediated by gut microbiota in juvenile rats via ingestion of <i>Lactobacillus rhamnosus</i> GG                    | Animal Study |
| Srivastava 2020   | Reduced rotavirus vaccine efficacy in protein malnourished human-faecal-microbiota-transplanted gnotobiotic pig model is in part attributed to the gut microbiota                                | Animal Study |
| Goo 2020          | The effect of fecal microbiota transplantation on autistic-like behaviors in <i>Fmr1</i> KO mice                                                                                                 | Animal Study |
| Ross 2020         | Feasibility of fecal microbiota transplantation via oral gavage to safely alter gut microbiome composition in marmosets                                                                          | Animal Study |
| Xi 2020           | Stachyose increases intestinal barrier through <i>Akkermansia muciniphila</i> and reduces gut inflammation in germ-free mice after human fecal transplantation                                   | Animal Study |
| DÁmato 2020       | Faecal microbiota transplant from aged donor mice affects spatial learning and memory via modulating hippocampal synaptic plasticity- and neurotransmission-related proteins in young recipients | Animal Study |
| Lee 2020          | Gut Microbiota-Derived Short-Chain Fatty Acids Promote Poststroke Recovery in Aged Mice                                                                                                          | Animal Study |
| Liu 2020          | Fecal microbiota transplantation by enema reduces intestinal injury in experimental necrotizing enterocolitis                                                                                    | Animal Study |
| Avila 2020        | Protective effects of fecal microbiota transplantation in sepsis are independent of the modulation of the intestinal flora                                                                       | Animal Study |
| McKinney 2020     | The fecal microbiota of healthy donor horses and geriatric recipients undergoing fecal microbial transplantation for the treatment of diarrhea                                                   | Animal Study |
| Michael 2020      | Malnutrition Decreases Antibody Secreting Cell Numbers Induced by an Oral Attenuated Human Rotavirus Vaccine in a Human Infant Fecal Microbiota Transplanted Gnotobiotic Pig Model               | Animal Study |
| Torres 2020       | Infants born to mothers with IBD present with altered gut microbiome that transfers abnormalities of the adaptive immune system to germ-free mice                                                | Animal Study |
| Lei 2019          | Enhanced GII.4 human norovirus infection in gnotobiotic pigs transplanted with a human gut microbiota                                                                                            | Animal Study |
| Zachariassen 2019 | Cesarean section increases sensitivity to oxazolone-induced colitis in C57BL/6 mice                                                                                                              | Animal Study |
| Dhaka 2019        | Amish (Rural) vs. non-Amish (Urban) Infant Fecal Microbiotas Are Highly Diverse and Their Transplantation Lead to Differences in Mucosal Immune Maturation in a Humanized Germfree Piglet Model  | Animal Study |
| Abdel-Gadir 2019  | Microbiota therapy acts via a regulatory T cell MyD88/ROR $\gamma$ t pathway to suppress food allergy                                                                                            | Animal Study |
| Chadchan 2019     | Antibiotic therapy with metronidazole reduces endometriosis disease progression in mice: a potential role for gut microbiota                                                                     | Animal Study |
| Spychala 2018     | Age-related changes in the gut microbiota influence systemic inflammation and stroke outcome                                                                                                     | Animal Study |
| Zhang 2017        | Environmental spread of microbes impacts the development of metabolic phenotypes in mice transplanted with microbial communities from humans                                                     | Animal Study |
| Planer 2016       | Development of the gut microbiota and mucosal IgA responses in twins and gnotobiotic mice                                                                                                        | Animal Study |
| Nagy-Szakal 2015  | Loss of n-6 fatty acid induced pediatric obesity protects against acute murine colitis                                                                                                           | Animal Study |
| Brown 2016        | Prolonged antibiotic treatment induces a diabetogenic intestinal microbiome that accelerates diabetes in NOD mice                                                                                | Animal Study |

|                     |                                                                                                                                                                                     |              |
|---------------------|-------------------------------------------------------------------------------------------------------------------------------------------------------------------------------------|--------------|
| Cassir 2016         | Gut microbiota and the pathogenesis of necrotizing enterocolitis in preterm neonates                                                                                                | Animal Study |
| Spinner 2020        | Fecal microbiota transplantation in a toddler after heart transplant was a safe and effective treatment for recurrent Clostridioides difficile infection: A case report             | Case report  |
| Barfuss 2018        | Cardiac allograft vasculopathy following fecal microbiota transplantation for recurrent C. difficile infection                                                                      | Case report  |
| Wu 2021             | Fecal microbiota transplantation before hematopoietic stem cell transplantation in a pediatric case of chronic diarrhea with a FOXP3 mutation                                       | Case report  |
| Zhang 2021          | Longitudinal dynamics of gut bacteriome, mycobiome and virome after fecal microbiota transplantation in graft-versus-host disease                                                   | Case report  |
| Singh 2019          | Oral fecal microbiota transplant for recurrent Clostridium difficile in pediatric autoimmune enteropathy                                                                            | Case report  |
| Stenberg 2022       | Faecal transplantation in a two-year-old child with therapy-resistant Clostridioides difficile infection                                                                            | Case report  |
| Sabus 2021          | Fecal Microbiota Transplantation for Treatment of Severe Clostridioides difficile Colitis in a Pediatric Patient With Non-Hodgkin Lymphoma                                          | Case report  |
| Menendez 2019       | Severe neonatal anemia due to fetomaternal hemorrhage: an illustrative case                                                                                                         | Case report  |
| Bulik-Sullivan 2018 | Intestinal Microbial and Metabolic Alterations Following Successful Fecal Microbiota Transplant for D-Lactic Acidosis                                                               | case report  |
| Sierra Salinas 2018 | Faecal microbiota transplant in a child with very early onset inflammatory bowel disease                                                                                            | case report  |
| Dow 2018            | Clostridium difficile cure with fecal microbiota transplantation in a child with Pompe disease: a case report                                                                       | case report  |
| Davidovics 2017     | Fecal Transplantation Successfully Treats Recurrent D-Lactic Acidosis in a Child With Short Bowel Syndrome                                                                          | case report  |
| Flannigan 2017      | Changes in Composition of the Gut Bacterial Microbiome after Fecal Microbiota Transplantation for Recurrent Clostridium difficile Infection in a Pediatric Heart Transplant Patient | case report  |
| Wang 2017           | 16S rDNA Gene Sequencing Analysis in Functional Dyspepsia Treated With Fecal Microbiota Transplantation                                                                             | case report  |
| Zhao 2017           | The Effect of Fecal Microbiota Transplantation on a Child with Tourette Syndrome                                                                                                    | case report  |
| Loke 2016           | Fecal microbial transplantation in a pediatric case of recurrent Clostridium difficile infection and specific antibody deficiency                                                   | case report  |
| Kumagai 2016        | Failure of Fecal Microbiota Transplantation in a Three-Year-Old Child with Severe Refractory Ulcerative Colitis                                                                     | case report  |
| Shimizu 2016        | Repeated fecal microbiota transplantation in a child with ulcerative colitis                                                                                                        | case report  |
| Samuel 2016         | NURSING ASSESSMENT FOR "DO IT YOURSELF" FECAL MICROBIOTA TRANSPLANTATION                                                                                                            | case report  |
| Vandenplas 2015     | Fecal Microbial Transplantation in Early-Onset Colitis: Caution Advised                                                                                                             | Case report  |
| Wang 2015           | Pediatric severe pseudomembranous enteritis treated with fecal microbiota transplantation in a 13-month-old infant                                                                  | case report  |
| Kahn 2012           | Colonoscopic fecal microbiota transplant for recurrent Clostridium difficile infection in a child                                                                                   | case report  |
| Russell 2010        | Fecal bacteriotherapy for relapsing Clostridium difficile infection in a child: a proposed treatment protocol                                                                       | case report  |
| Ge 2017             | Atypical Late-Onset Immune Dysregulation, Polyendocrinopathy, Enteropathy, X-Linked Syndrome with Intractable Diarrhea: A Case Report                                               | case report  |
| Beurden 2019        | serial Microbiota Analysis after Fecal Microbiota Transplantation in a Child with Down's Syndrome                                                                                   | case report  |
| Ooijevaar 2019      | Faecal transplants for children with recurrent infections                                                                                                                           | Case series  |
| Barfield 2018       | Going to the Bank: Fecal Microbiota Transplantation in Pediatrics                                                                                                                   | case series  |
| Bluestone 2018      | Fecal Microbiota Transplantation for Recurrent Clostridium difficile Infections in Pediatric Hematopoietic Stem Cell Transplant Recipients                                          | Case series  |

|                   |                                                                                                                                                                                                                                                                                                                      |                 |
|-------------------|----------------------------------------------------------------------------------------------------------------------------------------------------------------------------------------------------------------------------------------------------------------------------------------------------------------------|-----------------|
| Kronman 2015      | Fecal microbiota transplantation via nasogastric tube for recurrent clostridium difficile infection in pediatric patients                                                                                                                                                                                            | case series     |
| Walia 2014        | Efficacy of fecal microbiota transplantation in 2 children with recurrent Clostridium difficile infection and its impact on their growth and gut microbiome                                                                                                                                                          | case series     |
| Pierog 2014       | Fecal microbiota transplantation in children with recurrent Clostridium difficile infection                                                                                                                                                                                                                          | case series     |
| Russell 2014      | Fecal transplant for recurrent Clostridium difficile infection in children with and without inflammatory bowel disease                                                                                                                                                                                               | case series     |
| Petito 2019       | Commentary to "Safety, Clinical Response, and Microbiome Findings Following Fecal Microbiota Transplant in Children With Inflammatory Bowel Disease"                                                                                                                                                                 | Editorial       |
| Lynch 2015        | Fecal Microbiota Transplantation for Recurrent Clostridium difficile Infection in Pediatric Patients: Encouragement Wrapped in Caution                                                                                                                                                                               | Editorial       |
| Kang 2019         | Long-term benefit of Microbiota Transfer Therapy on autism symptoms and gut microbiota                                                                                                                                                                                                                               | Duplicate Study |
| Kattner 2022      | About gladiators and a sacred disease                                                                                                                                                                                                                                                                                | Editorial       |
| Helve 2021        | Giving faecal transplants to infants born by Caesarean section produced similar gut microbiota results to vaginal deliveries                                                                                                                                                                                         | Editorial       |
| Haifer 2020       | Faecal microbiota transplantation as an elixir of youth                                                                                                                                                                                                                                                              | Editorial       |
| Groves 2020       | Winning with poo? Fecal microbiome transplantation as an emerging strategy for the management of recurrent Clostridioides difficile infection in children                                                                                                                                                            | Editorial       |
| Russell 2016      | New treatments for ulcerative colitis: do we have pediatric data?                                                                                                                                                                                                                                                    | Editorial       |
| Goyal 2019        | Author's Reply to Drs. Franco Scaldaferri and Valentina Petito, PhD                                                                                                                                                                                                                                                  | Editorial       |
| Kociolek 2019     | Response to: Treatment of (Recurrent) Clostridioides difficile Infections in Children and Adults                                                                                                                                                                                                                     | Editorial       |
| Hourigan 2021     | Updates and Challenges in Fecal Microbiota Transplantation for Clostridioides difficile Infection in Children                                                                                                                                                                                                        | Guidelines      |
| No author 2021    | Clostridioides difficile infection: antimicrobial prescribing                                                                                                                                                                                                                                                        | guidelines      |
| Rogers 2020       | Clinical Guideline Highlights for the Hospitalist: Clostridium difficile Infections in Children                                                                                                                                                                                                                      | guidelines      |
| Diorio 2018       | Guideline for the Management of Clostridium Difficile Infection in Children and Adolescents With Cancer and Pediatric Hematopoietic Stem-Cell Transplantation Recipients                                                                                                                                             | Guidelines      |
| Davidovics 2019   | Fecal Microbiota Transplantation for Recurrent Clostridium difficile Infection and Other Conditions in Children: A Joint Position Paper From the North American Society for Pediatric Gastroenterology, Hepatology, and Nutrition and the European Society for Pediatric Gastroenterology, Hepatology, and Nutrition | guidelines      |
| Trubiano 2016     | Australasian Society of Infectious Diseases updated guidelines for the management of Clostridium difficile infection in adults and children in Australia and New Zealand                                                                                                                                             | guidelines      |
| Alonso 2022       | American Society for Transplantation and Cellular Therapy Series: #5-Management of Clostridioides difficile Infection in Hematopoietic Cell Transplant Recipients                                                                                                                                                    | Guidelines      |
| Turner 2018       | Management of Paediatric Ulcerative Colitis, Part 1: Ambulatory Care-An Evidence-based Guideline From European Crohn's and Colitis Organization and European Society of Paediatric Gastroenterology, Hepatology and Nutrition                                                                                        | Guidelines      |
| Turner 2018       | Management of Paediatric Ulcerative Colitis, Part 2: Acute Severe Colitis-An Evidence-based Consensus Guideline From the European Crohn's and Colitis Organization and the European Society of Paediatric Gastroenterology, Hepatology and Nutrition                                                                 | guidelines      |
| Tang 2017         | Is frozen fecal microbiota transplantation as effective as fresh fecal microbiota transplantation in patients with recurrent or refractory Clostridium difficile infection: A meta-analysis?                                                                                                                         | Meta-analysis   |
| Imdad 2018        | Fecal transplantation for treatment of inflammatory bowel disease                                                                                                                                                                                                                                                    | Meta-analysis   |
| Uzan-Yulzari 2021 | Neonatal antibiotic exposure impairs child growth during the first six years of life by perturbing intestinal microbial colonization                                                                                                                                                                                 | Non ASD         |

|                          |                                                                                                                                                                                                                                      |         |
|--------------------------|--------------------------------------------------------------------------------------------------------------------------------------------------------------------------------------------------------------------------------------|---------|
| Chehoud 2016             | Transfer of Viral Communities between Human Individuals during Fecal Microbiota Transplantation                                                                                                                                      | Non ASD |
| Korpela 2020             | Maternal Fecal Microbiota Transplantation in Cesarean-Born Infants Rapidly Restores Normal Gut Microbial Development: A Proof-of-Concept Study                                                                                       | Non ASD |
| Merli 2020               | Decolonization of multi-drug resistant bacteria by fecal microbiota transplantation in five pediatric patients before allogeneic hematopoietic stem cell transplantation: gut microbiota profiling, infectious and clinical outcomes | Non ASD |
| Karolewska-Bochenek 2018 | A Two-Week Fecal Microbiota Transplantation Course in Pediatric Patients with Inflammatory Bowel Disease                                                                                                                             | Non ASD |
| Zhong 2019               | Fecal microbiota transplantation for refractory diarrhea in immunocompromised diseases: a pediatric case report                                                                                                                      | Non ASD |
| Zhao 2020                | The Efficacy of Fecal Microbiota Transplantation for Children With Tourette Syndrome: A Preliminary Study                                                                                                                            | Non ASD |
| Quagliariello 2020       | Fecal Microbiota Transplant in Two Ulcerative Colitis Pediatric Cases: Gut Microbiota and Clinical Course Correlations                                                                                                               | Non ASD |
| Yodoshi 2018             | Fecal Microbiota Transplantation to Patients with Refractory Very Early Onset Ulcerative Colitis                                                                                                                                     | Non ASD |
| Kellermayer 2015         | Serial fecal microbiota transplantation alters mucosal gene expression in pediatric ulcerative colitis                                                                                                                               | Non ASD |
| Suskind 2015             | Fecal microbial transplant via nasogastric tube for active pediatric ulcerative colitis                                                                                                                                              | Non ASD |
| Guchte 2021              | Dynamic Properties of the Intestinal Ecosystem Call for Combination Therapies, Targeting Inflammation and Microbiota, in Ulcerative Colitis                                                                                          | Non ASD |
| Karolewska-Bochenek 2021 | Faecal Microbiota Transfer - a new concept for treating cytomegalovirus colitis in children with ulcerative colitis                                                                                                                  | Non ASD |
| Zhong 2021               | Colonic Transendoscopic Enteral Tubing: Route for a Novel, Safe, and Convenient Delivery of Washed Microbiota Transplantation in Children                                                                                            | Non ASD |
| Suskind 2015             | Fecal microbial transplant effect on clinical outcomes and fecal microbiome in active Crohn's disease                                                                                                                                | Non ASD |
| Goloshchapov 2020        | Fecal microbiota transplantation for graft-versus-host disease in children and adults: methods, clinical effects, safety                                                                                                             | Non ASD |
| Goyal 2018               | Safety, Clinical Response, and Microbiome Findings Following Fecal Microbiota Transplant in Children With Inflammatory Bowel Disease                                                                                                 | Non ASD |
| Nusbaum 2018             | Gut microbial and metabolomic profiles after fecal microbiota transplantation in pediatric ulcerative colitis patients                                                                                                               | Non ASD |
| Kunde 2013               | Safety, tolerability, and clinical response after fecal transplantation in children and young adults with ulcerative colitis                                                                                                         | Non ASD |
| Chen 2022                | FTACMT study protocol: a multicentre, double-blind, randomised, placebo-controlled trial of faecal microbiota transplantation for autism spectrum disorder                                                                           | Non ASD |
| Wilson 2021              | Strain engraftment competition and functional augmentation in a multi-donor fecal microbiota transplantation trial for obesity                                                                                                       | Non ASD |
| Leong 2020               | Effects of Fecal Microbiome Transfer in Adolescents With Obesity: The Gut Bugs Randomized Controlled Trial                                                                                                                           | Non ASD |
| Xi 2019                  | Fecal microbiota transplantation in children does not significantly alter body mass index                                                                                                                                            | Non ASD |
| Popov 2021               | Pediatric Patient and Parent Perceptions of Fecal Microbiota Transplantation for the Treatment of Ulcerative Colitis                                                                                                                 | Non ASD |
| Pai 2021                 | Results of the First Pilot Randomized Controlled Trial of Fecal Microbiota Transplant In Pediatric Ulcerative Colitis: Lessons, Limitations, and Future Prospects                                                                    | Non ASD |
| Liu 2017                 | Fecal microbiota transplantation induces remission of infantile allergic colitis through gut microbiota re-establishment                                                                                                             | Non ASD |
| Cho 2019                 | Fecal Microbiota Transplant for Recurrent Clostridium difficile Infection in Pediatric Inflammatory Bowel Disease                                                                                                                    | Non ASD |
| Cui 2015                 | Step-up fecal microbiota transplantation strategy: a pilot study for steroid-dependent ulcerative colitis                                                                                                                            | Non ASD |
| Qureshi 2020             | Not reporting ASD outcomes after FMT                                                                                                                                                                                                 | Non ASD |



|                                                                                                            |                                                                                                                                                                                                             |         |
|------------------------------------------------------------------------------------------------------------|-------------------------------------------------------------------------------------------------------------------------------------------------------------------------------------------------------------|---------|
| Li 2020                                                                                                    | Composition of "gold juice" using an ancient method based on intestinal microecology                                                                                                                        | Non ASD |
| Kelly 2014                                                                                                 | Fecal microbiota transplant for treatment of Clostridium difficile infection in immunocompromised patients                                                                                                  | Non ASD |
| Pai, N; Popov, J; Hartung, E; Hill, L; Thabane, L; Lee, C; Surette, M; Godin, D; Grzywacz, SJ; Moayyedi, P | RESULTS OF THE FIRST PILOT RANDOMIZED CONTROLLED TRIAL OF FAECAL MICROBIOTA TRANSPLANT FOR PEDIATRIC ULCERATIVE COLITIS                                                                                     | Non ASD |
| Popov, J; Hartung, E; Hill, L; Chauhan, U; Pai, N                                                          | FECAL MICROBIOTA TRANSPLANTATION: PERCEPTIONS AND EXPERIENCES IN A PEDIATRIC ULCERATIVE COLITIS POPULATION (PEDIFETCH TRIAL)                                                                                | Non ASD |
| Pai, N; Popov, J; Hartung, E; Hill, L; Thabane, L; Lee, C; Surette, M; Godin, D; Grzywacz, K; Moayyedi, P  | Results of the first pilot randomized controlled trial of faecal microbiota transplant for pediatric ulcerative colitis                                                                                     | Non ASD |
| Drewes 2019                                                                                                | Transmission and clearance of potential procarcinogenic bacteria during fecal microbiota transplantation for recurrent Clostridioides difficile                                                             | Non ASD |
| Hourigan 2019                                                                                              | Fecal Transplant in Children With Clostridioides difficile Gives Sustained Reduction in Antimicrobial Resistance and Potential Pathogen Burden                                                              | Non ASD |
| Li 2018                                                                                                    | Clinical Efficacy and Microbiome Changes Following Fecal Microbiota Transplantation in Children With Recurrent Clostridium Difficile Infection                                                              | Non ASD |
| Barnes 2018                                                                                                | Competitively Selected Donor Fecal Microbiota Transplantation: Butyrate Concentration and Diversity as Measures of Donor Quality                                                                            | Non ASD |
| Fareed 2018                                                                                                | Applying fecal microbiota transplantation (FMT) to treat recurrent Clostridium difficile infections (rCDI) in children                                                                                      | Non ASD |
| Hourigan 2015                                                                                              | Microbiome changes associated with sustained eradication of Clostridium difficile after single faecal microbiota transplantation in children with and without inflammatory bowel disease                    | Non ASD |
| Shimizu 2019                                                                                               | P043 OUTCOME OF THE REPETITIVE FECAL MICROBIOTA TRANSPLANTATION USING FECAL SOLUTION PREPARED UNDER THE ANAEROBIC CONDITION FOLLOWING THE ANTIBIOTIC PRETREATMENT IN EIGHT CHILDREN WITH ULCERATIVE COLITIS | Non ASD |
| Nicholson 2022                                                                                             | Efficacy and Outcomes of Faecal Microbiota Transplantation for Recurrent Clostridioides difficile Infection in Children with Inflammatory Bowel Disease                                                     | Non ASD |
| Li 2022                                                                                                    | Characteristics and management of children with Clostridioides difficile infection at a tertiary pediatric hospital in China                                                                                | Non ASD |
| Ruan 2021                                                                                                  | Alternative Diagnoses in Pediatric Fecal Microbiota Transplant Referral Patients                                                                                                                            | Non ASD |
| Nicholson 2020                                                                                             | Efficacy of Fecal Microbiota Transplantation for Clostridium difficile Infection in Children                                                                                                                | Non ASD |
| Aldrich 2019                                                                                               | Analysis of Treatment Outcomes for Recurrent Clostridium difficile Infections and Fecal Microbiota Transplantation in a Pediatric Hospital                                                                  | Non ASD |
| Zhang 2018                                                                                                 | Safety of fecal microbiota transplantation in Chinese children: A single-center retrospective study                                                                                                         | Non ASD |
| Brumbaugh 2018                                                                                             | An Intragastric Fecal Microbiota Transplantation Program for Treatment of Recurrent Clostridium difficile in Children is Efficacious, Safe, and Inexpensive                                                 | Non ASD |
| Buonsenso 2022                                                                                             | Clostridioides difficile Infection in Children: A 5-Year Multicenter Retrospective Study                                                                                                                    | Non ASD |

|                                                                   |                                                                                                                                                                                                                                            |         |
|-------------------------------------------------------------------|--------------------------------------------------------------------------------------------------------------------------------------------------------------------------------------------------------------------------------------------|---------|
| McIlroy, J;<br>Nalagatla, N;<br>Hansen, R;<br>Hart, A; Hold,<br>G | FMT as a treatment for IBD: a national survey of gastroenterologists in the UK                                                                                                                                                             | Non ASD |
| Siranosian<br>2020                                                | Author Correction: Acquisition, transmission and strain diversity of human gut-colonizing crAss-like phages                                                                                                                                | Not FMT |
| Huang 2021                                                        | Higher fibrotic content of endometriotic lesions is associated with diminished prostaglandin E2 signaling                                                                                                                                  | Not FMT |
| Zhou 2021                                                         | Nanoarmour-shielded single-cell factory for bacteriotherapy of Parkinson's disease                                                                                                                                                         | Not FMT |
| Vallianou<br>2021                                                 | Understanding the Role of the Gut Microbiome and Microbial Metabolites in Non-Alcoholic Fatty Liver Disease: Current Evidence and Perspectives                                                                                             | Not FMT |
| Philips 2022                                                      | The role of gut microbiota in clinical complications, disease severity, and treatment response in severe alcoholic hepatitis                                                                                                               | not FMT |
| Hathibelagal<br>2021                                              | Evaluation of photoreceptor function in inherited retinal diseases using rod- and cone-enhanced flicker stimuli                                                                                                                            | not FMT |
| Gregory 2022                                                      | MetaPop: a pipeline for macro- and microdiversity analyses and visualization of microbial and viral metagenome-derived populations                                                                                                         | Not FMT |
| Wilson 2021                                                       | Oral administration of maternal vaginal microbes at birth to restore gut microbiome development in infants born by caesarean section: A pilot randomised placebo-controlled trial                                                          | not FMT |
| Galipeau 2021                                                     | Novel Fecal Biomarkers That Precede Clinical Diagnosis of Ulcerative Colitis                                                                                                                                                               | not FMT |
| Alghamdi<br>2022                                                  | Bee Pollen and Probiotics May Alter Brain Neuropeptide Levels in a Rodent Model of Autism Spectrum Disorders                                                                                                                               | not FMT |
| Onuki 2021                                                        | Dopaminergic restoration of prefrontal cortico-putaminal network in gene therapy for aromatic l-amino acid decarboxylase deficiency                                                                                                        | not FMT |
| Pinheiro 2021                                                     | Cryptococcal meningitis in non-HIV patients in the State of Amazonas, Northern Brazil                                                                                                                                                      | not FMT |
| Sasaki 2021                                                       | Growth stimulation of Bifidobacterium from human colon using daikenchuto in an in vitro model of human intestinal microbiota                                                                                                               | not FMT |
| Warda 2021                                                        | A postbiotic consisting of heat-treated lactobacilli has a bifidogenic effect in pure culture and in human fermented faecal communities                                                                                                    | not FMT |
| Rahne 2021                                                        | A retrospective European multicenter analysis of the functional outcomes after active middle ear implant surgery using the third generation vibroplasty couplers                                                                           | not FMT |
| Bondue 2020                                                       | Effect of Bifidobacterium crudilactis and 3'-sialyllactose on the toddler microbiota using the SHIME® model                                                                                                                                | not FMT |
| Zhao 2020                                                         | Long-term Outcomes of Clip Coupler Implantation in Patients with Unilateral Congenital Aural Atresia                                                                                                                                       | not FMT |
| Krol 2020                                                         | Mastoid Obliteration with S53P4 Bioactive Glass Can Make Bonebridge Implantation Feasible: A Case Report                                                                                                                                   | not FMT |
| Troisi 2020                                                       | Genome, Environment, Microbiome and Metabolome in Autism (GEMMA) Study Design: Biomarkers Identification for Precision Treatment and Primary Prevention of Autism Spectrum Disorders by an Integrated Multi-Omics Systems Biology Approach | not FMT |
| Koo 2020                                                          | Strain Tracking to Identify Individualized Patterns of Microbial Strain Stability in the Developing Infant Gut Ecosystem                                                                                                                   | not FMT |
| Woodworth<br>2020                                                 | mSphere of Influence: Microbiome-Associated Phenotypes Are Modifiable                                                                                                                                                                      | not FMT |
| Little 2020                                                       | Gut microbiome in primary sclerosing cholangitis: A review                                                                                                                                                                                 | not FMT |
| Manti 2020                                                        | Bacteriotherapy with Streptococcus salivarius 24SMB and Streptococcus oralis 89a nasal spray for treatment of upper respiratory tract infections in children: a pilot study on short-term efficacy                                         | Not FMT |
| Tarantino<br>2020                                                 | Oral bacteriotherapy in children with recurrent respiratory infections: a real-life study                                                                                                                                                  | not FMT |
| Albuhairi 2020                                                    | Novel Therapies for Treatment of Food Allergy                                                                                                                                                                                              | not FMT |

|                       |                                                                                                                                                                                                           |         |
|-----------------------|-----------------------------------------------------------------------------------------------------------------------------------------------------------------------------------------------------------|---------|
| Song 2020             | The Microbiota in Hematologic Malignancies                                                                                                                                                                | not FMT |
| Chen 2020             | Probiotic mixtures with aerobic constituent promoted the recovery of multi-barriers in DSS-induced chronic colitis                                                                                        | not FMT |
| Walker 2019           | Transcriptomic changes during TGF- $\beta$ -mediated differentiation of airway fibroblasts to myofibroblasts                                                                                              | not FMT |
| Kılınç 2019           | Prevalence, aetiology, and treatment of molar incisor hypomineralization in children living in Izmir City (Turkey)                                                                                        | not FMT |
| Figueiredo 2019       | Human parvovirus B19 genotype 1 in suspected dengue patients of Tefé, Amazonas State, Brazil                                                                                                              | not FMT |
| Araki 2019            | Foveal avascular zone and macular vessel density after correction for magnification error in unilateral amblyopia using optical coherence tomography angiography                                          | Not FMT |
| Morffy 2019           | Composition of the gut microbiota transcends genetic determinants of malaria infection severity and influences pregnancy outcome                                                                          | not FMT |
| Borrelli 2019         | MACULAR MICROVASCULAR NETWORKS IN HEALTHY PEDIATRIC SUBJECTS                                                                                                                                              | not FMT |
| Garcia-Fernandez 2019 | Whole-genome sequencing reveals nosocomial Clostridioides difficile transmission and a previously unsuspected epidemic scenario                                                                           | not FMT |
| Bauman 2019           | Preliminary evidence of increased striatal dopamine in a nonhuman primate model of maternal immune activation                                                                                             | not FMT |
| Biagi 2019            | Early gut microbiota signature of aGvHD in children given allogeneic hematopoietic cell transplantation for hematological disorders                                                                       | not FMT |
| Tarantino 2019        | Bacteriotherapy in children with recurrent upper respiratory tract infections                                                                                                                             | not FMT |
| Bellussi 2019         | An overview on upper respiratory tract infections and bacteriotherapy as innovative therapeutic strategy                                                                                                  | not FMT |
| La Mantia 2019        | The role of bacteriotherapy in the prevention of adenoidectomy                                                                                                                                            | not FMT |
| Passali 2019          | The efficacy and tolerability of Streptococcus salivarius 24SMB and Streptococcus oralis 89a administered as nasal spray in the treatment of recurrent upper respiratory tract infections in children     | not FMT |
| Andaloro 2019         | Bacteriotherapy with Streptococcus salivarius 24SMB and Streptococcus oralis 89a oral spray for children with recurrent streptococcal pharyngotonsillitis: a randomized placebo-controlled clinical study | not FMT |
| Feehley 2019          | Healthy infants harbor intestinal bacteria that protect against food allergy                                                                                                                              | not FMT |
| Reeves 2018           | Fibroblast gene expression following asthmatic bronchial epithelial cell conditioning correlates with epithelial donor lung function and exacerbation history                                             | not FMT |
| Zhu 2018              | Long noncoding RNA TUG1 promotes cardiac fibroblast transformation to myofibroblasts via miR-29c in chronic hypoxia                                                                                       | not FMT |
| Montassier 2018       | CLOUD: a non-parametric detection test for microbiome outliers                                                                                                                                            | not FMT |
| Hochman 2018          | Immunoassay helps limit overdiagnosis of Clostridium difficile infection                                                                                                                                  | not FMT |
| Bellussi 2018         | Preventive nasal bacteriotherapy for the treatment of upper respiratory tract infections and sleep disordered breathing in children                                                                       | not FMT |
| James 2018            | Deficient Follistatin-like 3 Secretion by Asthmatic Airway Epithelium Impairs Fibroblast Regulation and Fibroblast-to-Myofibroblast Transition                                                            | not FMT |
| Tarantino 2018        | Bacteriotherapy for preventing recurrent upper respiratory infections in children: a real-world experience                                                                                                | not FMT |
| Willyard 2018         | Squeaky clean mice could be ruining research                                                                                                                                                              | not FMT |
| Jiang 2018            | Comparison of two different combined test strips with fluorescent microspheres or colored microspheres as tracers for rotavirus and adenovirus detection                                                  | not FMT |
| Metwally 2018         | MetaLonDA: a flexible R package for identifying time intervals of differentially abundant features in metagenomic longitudinal studies                                                                    | not FMT |
| Gonzalo-skok 2017     | AGE DIFFERENCES IN MEASURES OF FUNCTIONAL MOVEMENT AND PERFORMANCE IN HIGHLY YOUTH BASKETBALL PLAYERS                                                                                                     | not FMT |

|                |                                                                                                                                                                                                                 |         |
|----------------|-----------------------------------------------------------------------------------------------------------------------------------------------------------------------------------------------------------------|---------|
| Fischer 2017   | Protein Malnutrition Alters Tryptophan and Angiotensin-Converting Enzyme 2 Homeostasis and Adaptive Immune Responses in Human Rotavirus-Infected Gnotobiotic Pigs with Human Infant Fecal Microbiota Transplant | not FMT |
| La Mantia 2017 | Bacteriotherapy with Streptococcus salivarius 24SMB and Streptococcus oralis 89a nasal spray for preventing recurrent acute otitis media in children: a real-life clinical experience                           | not FMT |
| Ekmekci 2017   | The Probiotic Compound VSL#3 Modulates Mucosal, Peripheral, and Systemic Immunity Following Murine Broad-Spectrum Antibiotic Treatment                                                                          | not FMT |
| Vemuri 2017    | Therapeutic interventions for gut dysbiosis and related disorders in the elderly: antibiotics, probiotics or faecal microbiota transplantation?                                                                 | not FMT |
| Huang 2017     | Mutations in Interleukin-10 Receptor and Clinical Phenotypes in Patients with Very Early Onset Inflammatory Bowel Disease: A Chinese VEO-IBD Collaboration Group Survey                                         | not FMT |
| Knoll 2017     | Gut microbiota differs between children with Inflammatory Bowel Disease and healthy siblings in taxonomic and functional composition: a metagenomic analysis                                                    | not FMT |
| Ishiguro 2017  | Biochemical analysis of intraplacental choriocarcinoma and fetomaternal transfusion                                                                                                                             | not FMT |
| Celerier 2017  | Results of VSB implantation at the short process of the incus in children with ear atresia                                                                                                                      | not FMT |
| Yousuf 2017    | Effect of Freeze Dried Powdered Probiotics on Gingival Status and Plaque Inhibition: A Randomized, Double-blind, Parallel Study                                                                                 | not FMT |
| Kuperman 2016  | Antibiotic use during pregnancy: how bad is it?                                                                                                                                                                 | not FMT |
| Shin 2016      | Clostridium difficile Infection                                                                                                                                                                                 | not FMT |
| Fong 2016      | A Novel Balance Training Program for Children With Developmental Coordination Disorder: A Randomized Controlled Trial                                                                                           | not FMT |
| Rodriguez 2016 | Probiotic Compared with Standard Milk for High-caries Children: A Cluster Randomized Trial                                                                                                                      | not FMT |
| Fong 2016      | Task-Specific Balance Training Improves the Sensory Organisation of Balance Control in Children with Developmental Coordination Disorder: A Randomised Controlled Trial                                         | not FMT |
| Busch 2016     | Comparison of Alternative Coupling Methods of the Vibrant Soundbridge Floating Mass Transducer                                                                                                                  | not FMT |
| Thomas 2015    | Probiotics: a proactive approach to health. A symposium report                                                                                                                                                  | not FMT |
| Santagati 2015 | Colonization, safety, and tolerability study of the Streptococcus salivarius 24SMBc nasal spray for its application in upper respiratory tract infections                                                       | not FMT |
| Patel 2015     | New approaches for bacteriotherapy: prebiotics, new-generation probiotics, and synbiotics                                                                                                                       | not FMT |
| Franscini 2015 | Pediatric reference intervals for plasma free and total metanephrines established with a parametric approach: relevance to the diagnosis of neuroblastoma                                                       | not FMT |
| Reeves 2015    | Fibroblast-myofibroblast transition is differentially regulated by bronchial epithelial cells from asthmatic children                                                                                           | not FMT |
| Saraiva 2015   | Epidemiology of infectious meningitis in the State of Amazonas, Brazil                                                                                                                                          | not FMT |
| Kronman 2014   | Intestinal decontamination of multidrug-resistant Klebsiella pneumoniae after recurrent infections in an immunocompromised host                                                                                 | not FMT |
| Tian 2014      | Isolation and gut microbiota modulation of antibiotic-resistant probiotics from human feces                                                                                                                     | not FMT |
| Plontke 2014   | Individual computer-assisted 3D planning for surgical placement of a new bone conduction hearing device                                                                                                         | not FMT |
| Martins 2014   | Clinical and virological descriptive study in the 2011 outbreak of dengue in the Amazonas, Brazil                                                                                                               | not FMT |
| Sargsyan 2014  | Hearing rehabilitation with single-stage bilateral vibroplasty in a child with Franceschetti syndrome                                                                                                           | not FMT |
| Sammons 2013   | Diagnosis and Management of Clostridium difficile Infection by Pediatric Infectious Diseases Physicians                                                                                                         | not FMT |

|                       |                                                                                                                                                       |         |
|-----------------------|-------------------------------------------------------------------------------------------------------------------------------------------------------|---------|
| Zihler 2013           | Novel Polyfermentor intestinal model (PolyFermS) for controlled ecological studies: validation and effect of pH                                       | not FMT |
| Schwab 2013           | Do we really need a Coupler for the round window application of an AMEI?                                                                              | not FMT |
| Claud 2013            | Bacterial community structure and functional contributions to emergence of health or necrotizing enterocolitis in preterm infants                     | not FMT |
| Madu 2013             | Massive idiopathic feto-maternal transfusion associated with dilatation of umbilical vein: case report and review of literature                       | not FMT |
| Ciurea 2012           | Fludarabine, melphalan, thiotepa and anti-thymocyte globulin conditioning for unrelated cord blood transplant                                         | not FMT |
| Zernotti 2012         | Middle ear implants: functional gain in mixed hearing loss                                                                                            | not FMT |
| Twetman 2012          | Are we ready for caries prevention through bacteriotherapy?                                                                                           | not FMT |
| Beleites 2011         | Experience with vibroplasty couplers at the stapes head and footplate                                                                                 | not FMT |
| Floch 2011            | Recommendations for probiotic use-2011 update                                                                                                         | not FMT |
| Mandala 2011          | Treatment of the atretic ear with round window vibrant soundbridge implantation in infants and children: electrocochleography and audiologic outcomes | not FMT |
| Reix 2010             | Bone mineral and body composition alterations in paediatric cystic fibrosis patients                                                                  | not FMT |
| Keifer 2010           | Combined aesthetic and functional reconstruction of ear malformations                                                                                 | not FMT |
| Stamatova 2009        | Probiotics: health benefits in the mouth                                                                                                              | not FMT |
| Skovbjerg 2009        | Spray bacteriotherapy decreases middle ear fluid in children with secretory otitis media                                                              | not FMT |
| Caramina 2008         | Metchnikoff and the centenary of probiotics: an update of their use in gastroenteric pathology during the age of development                          | not FMT |
| Roessner 2008         | Color perception deficits in co-existing attention-deficit/hyperactivity disorder and chronic tic disorders                                           | not FMT |
| Brailon 2007          | Bone mineral content and body composition in overweight children and adolescents                                                                      | not FMT |
| Dobalian 2006         | Advance care planning documents in nursing facilities: results from a nationally representative survey                                                | not FMT |
| Banaschewski 2006     | Colour perception in ADHD                                                                                                                             | not FMT |
| Borborema-Santos 2006 | Oral focal epithelial hyperplasia: report of five cases                                                                                               | not FMT |
| De Figueiredo 2004    | Exanthematous diseases and the first epidemic of dengue to occur in Manaus, Amazonas State, Brazil, during 1998-1999                                  | not FMT |
| Todt 2004             | MRI scanning and incus fixation in vibrant soundbridge implantation                                                                                   | not FMT |
| Shaw 2004             | The effect of initial stimulus type for visual reinforcement audiometry                                                                               | not FMT |
| Roberts 2004          | Prenatal stress, moderate fetal alcohol, and dopamine system function in rhesus monkeys                                                               | not FMT |
| Walls 2003            | Bacteriocin-like inhibitory substance (BLIS) production by the normal flora of the nasopharynx: potential to protect against otitis media?            | not FMT |
| Brigidi 2003          | PCR detection of Bifidobacterium strains and Streptococcus thermophilus in feces of human subjects after oral bacteriotherapy and yogurt consumption  | not FMT |
| Rosenfeldt 2003       | Effect of probiotic Lactobacillus strains in children with atopic dermatitis                                                                          | not FMT |
| Hatayama 2003         | Evaluation of hemangioma by positron emission tomography: role in a multimodality approach                                                            | not FMT |
| Rosenfeldt 2002       | Effect of probiotic Lactobacillus strains in young children hospitalized with acute diarrhea                                                          | not FMT |

|                                                                                                                                                                                      |                                                                                                                                                                                |         |
|--------------------------------------------------------------------------------------------------------------------------------------------------------------------------------------|--------------------------------------------------------------------------------------------------------------------------------------------------------------------------------|---------|
| Eberling 2002                                                                                                                                                                        | No effect of age and estrogen on aromatic L- amino acid decarboxylase activity in rhesus monkey brain                                                                          | not FMT |
| Helin 2002                                                                                                                                                                           | No effect of oral treatment with an intestinal bacterial strain, <i>Lactobacillus rhamnosus</i> (ATCC 53103), on birch-pollen allergy: a placebo-controlled double-blind study | not FMT |
| Watanabe 2000                                                                                                                                                                        | PET imaging of musculoskeletal tumours with fluorine-18 alpha-methyltyrosine: comparison with fluorine-18 fluorodeoxyglucose PET                                               | not FMT |
| Kirjavainen 1999                                                                                                                                                                     | Healthy gut microflora and allergy: factors influencing development of the microbiota                                                                                          | not FMT |
| Inoue 1999                                                                                                                                                                           | 18F alpha-methyl tyrosine PET studies in patients with brain tumors                                                                                                            | not FMT |
| Ullman 1998                                                                                                                                                                          | Yogurt as oral bacteriotherapy for diarrhea: back to the future?                                                                                                               | not FMT |
| Shornikova 1997                                                                                                                                                                      | Bacteriotherapy with <i>Lactobacillus reuteri</i> in rotavirus gastroenteritis                                                                                                 | not FMT |
| Malin 1996                                                                                                                                                                           | Increased bacterial urease activity in faeces in juvenile chronic arthritis: evidence of altered intestinal microflora?                                                        | not FMT |
| Malin 1996                                                                                                                                                                           | Promotion of IgA immune response in patients with Crohn's disease by oral bacteriotherapy with <i>Lactobacillus GG</i>                                                         | not FMT |
| Slabospitskaia 1995                                                                                                                                                                  | A new preparation of biosporin and its effect on the intestinal microflora in dysbacterioses in newborn infants                                                                | not FMT |
| Isolauri 1994                                                                                                                                                                        | Oral bacteriotherapy for viral gastroenteritis                                                                                                                                 | not FMT |
| Gonzalez 1994                                                                                                                                                                        | Biotherapeutic role of fermented milk                                                                                                                                          | not FMT |
| Balli 1992                                                                                                                                                                           | High-dose oral bacteria-therapy for chronic non-specific diarrhea of infancy                                                                                                   | not FMT |
| Vanderby 1990                                                                                                                                                                        | Acute modification of biomechanical properties of the bone-ligament insertion to rat limb unweighting                                                                          | not FMT |
| Tvede 1990                                                                                                                                                                           | Bacteriotherapy for <i>Clostridium difficile</i> diarrhoea                                                                                                                     | not FMT |
| Benoni 1984                                                                                                                                                                          | Antibiotic administration and oral bacterial therapy in infants                                                                                                                | not FMT |
| Zoppi 1982                                                                                                                                                                           | Oral bacteriotherapy in clinical practice. II. The use of different preparations in the treatment of acute diarrhoea                                                           | not FMT |
| Zoppi 1982                                                                                                                                                                           | The use of different preparations in infants treated with antibiotics                                                                                                          | not FMT |
| Elkeles 1967                                                                                                                                                                         | Bacteriotherapy and stimulation therapy inspite, instead and with chemotherapy]                                                                                                | not FMT |
| Xi 2021                                                                                                                                                                              | Depicting the composition of gut microbiota in children with tic disorders: an exploratory study                                                                               | not FMT |
| Feng 2021                                                                                                                                                                            | Fecal microbiota from children with vitamin A deficiency impair colonic barrier function in germ-free mice: The possible role of alterative bile acid metabolites              | not FMT |
| Feng 2022                                                                                                                                                                            | Microorganisms in the reproductive system and probiotic's regulatory effects on reproductive health                                                                            | Not FMT |
| Gedam 2022                                                                                                                                                                           | Efficacy of Probiotic, Chlorhexidine, and Sodium Fluoride Mouthrinses on Mutans Streptococci in 8- to 12-Year-Old Children: A Crossover Randomized Trial                       | Not FMT |
| Cardile, S;<br>Pietrobbattista, A;<br>Del Chierico, F;<br>Vernocchi, P;<br>Russo, A;<br>Bracaglia, G;<br>Bernaschi, P;<br>Pansani, L;<br>Argentieri, M;<br>Putignani, L;<br>Torre, G | Gut microbiota profiling in an infant colonized by multiresistent germ candidate to liver transplantation                                                                      | not FMT |

|                       |                                                                                                                                                                                                                             |                                      |
|-----------------------|-----------------------------------------------------------------------------------------------------------------------------------------------------------------------------------------------------------------------------|--------------------------------------|
| Bekker 2019           | Dynamics of the Gut Microbiota in Children Receiving Selective or Total Gut Decontamination Treatment during Hematopoietic Stem Cell Transplantation                                                                        | not FMT                              |
| Del Chierico 2018     | Liver Transplantation and Gut Microbiota Profiling in a Child Colonized by a Multi-Drug Resistant <i>Klebsiella pneumoniae</i> : A New Approach to Move from Antibiotic to "Eubiotic" Control of Microbial Resistance       | not FMT                              |
| Simms-Waldrup 2017    | Antibiotic-Induced Depletion of Anti-inflammatory Clostridia Is Associated with the Development of Graft-versus-Host Disease in Pediatric Stem Cell Transplantation Patients                                                | not FMT                              |
| Taggart 2014          | An Overview of the Microbiome and the Effects of Antibiotics                                                                                                                                                                | not FMT                              |
| Song 2021             | Exploration of the relationship between intestinal flora changes and gut acute graft-versus-host disease after hematopoietic stem cell transplantation                                                                      | not FMT                              |
| Sarbagili-Shabat 2021 | Novel UC Exclusion Diet and Antibiotics for Treatment of Mild to Moderate Pediatric Ulcerative Colitis: A Prospective Open-Label Pilot Study                                                                                | not FMT                              |
| Talathi 2021          | Scheduled Empiric Antibiotics May Alter the Gut Microbiome and Nutrition Outcomes in Pediatric Intestinal Failure                                                                                                           | not FMT                              |
| Coker 2021            | Infant Feeding Alters the Longitudinal Impact of Birth Mode on the Development of the Gut Microbiota in the First Year of Life                                                                                              | not FMT                              |
| Gong 2021             | Effects of antibiotic treatment and probiotics on the gut microbiome of 40 infants delivered before term by cesarean section analysed by using 16s rRNA quantitative polymerase chain reaction sequencing                   | not FMT                              |
| Alexander 2021        | Neutrophil functional profiling and cytokine augmentation for patients with multiple recurrent infections: A case study                                                                                                     | not FMT                              |
| Kim 2020              | Delayed Establishment of Gut Microbiota in Infants Delivered by Cesarean Section                                                                                                                                            | not FMT                              |
| Xie 2019              | Impaired Chylomicron Assembly Modifies Hepatic Metabolism Through Bile Acid-Dependent and Transmissible Microbial Adaptations                                                                                               | not FMT                              |
| Zheng 2019            | Dietary Therapy in Conjunction with Immunosuppression to Treat Gastrointestinal Graft-versus-host Disease (GVHD)                                                                                                            | not FMT                              |
| Bunyavanich 2019      | Food allergy: could the gut microbiota hold the key?                                                                                                                                                                        | not FMT                              |
| Contijoch 2019        | Gut microbiota density influences host physiology and is shaped by host and microbial factors                                                                                                                               | not FMT                              |
| Kang 2020             | Distinct Fecal and Plasma Metabolites in Children with Autism Spectrum Disorders and Their Modulation after Microbiota Transfer Therapy                                                                                     | Not reporting ASD outcomes after FMT |
| NCT03582969,          | Capsulized Fecal Microbiota Transplantation in Pediatric Ulcerative Colitis Patients                                                                                                                                        | Ongoing Study                        |
| NCT05202990,          | Oral Fecal Microbiota Transplantation in Pediatric Ulcerative Colitis                                                                                                                                                       | Ongoing Study                        |
| Zeevenhooven 2020     | Protocol for a pilot randomised, double-blind, placebo-controlled trial for assessing the feasibility and efficacy of faecal microbiota transplantation in adolescents with refractory irritable bowel syndrome: FAIS Trial | Protocol                             |
| Leong 2019            | Protocol for the Gut Bugs Trial: a randomised double-blind placebo-controlled trial of gut microbiome transfer for the treatment of obesity in adolescents                                                                  | Protocol                             |
| Pai 2019              | Protocol for a double-blind, randomised, placebo-controlled pilot study for assessing the feasibility and efficacy of faecal microbiota transplant in a paediatric Crohn's disease population: PediCRaFT Trial              | Protocol                             |
| Pai 2017              | Protocol for a randomised, placebo-controlled pilot study for assessing feasibility and efficacy of faecal microbiota transplantation in a paediatric ulcerative colitis population: PediFETCh trial                        | protocol                             |
| Helve 2021            | Protocol for oral transplantation of maternal fecal microbiota to newborn infants born by cesarean section                                                                                                                  | Protocol                             |
| Fang 2018             | Protocol for Fecal Microbiota Transplantation in Inflammatory Bowel Disease: A Systematic Review and Meta-Analysis                                                                                                          | Protocol                             |
| Kellermayer 2022      | Fecal Microbiota Transplantation Commonly Failed in Children With Co-Morbidities                                                                                                                                            | Review                               |
| Frye 2015             | Approaches to studying and manipulating the enteric microbiome to improve autism symptoms                                                                                                                                   | review                               |

|                  |                                                                                                                                                                                                                                     |        |
|------------------|-------------------------------------------------------------------------------------------------------------------------------------------------------------------------------------------------------------------------------------|--------|
| Marra 2015       | Controversies Around Epidemiology, Diagnosis and Treatment of Clostridium difficile Infection                                                                                                                                       | review |
| Vandenplas 2015  | Fecal Microbiota Transplantation: Just a Fancy Trend?                                                                                                                                                                               | review |
| Esposito 2015    | Treatment of Clostridium difficile infection in pediatric patients                                                                                                                                                                  | review |
| Russell 2015     | Too early to determine whether fecal microbiota transplant has therapeutic promise for Ulcerative Colitis?                                                                                                                          | review |
| Kassam 2014      | Review of the emerging treatment of Clostridium difficile infection with fecal microbiota transplantation and insights into future challenges                                                                                       | review |
| Walia 2014       | Fecal microbiota transplantation in the treatment of refractory Clostridium difficile infection in children: an update                                                                                                              | review |
| Dickinson 2014   | Infectious diarrhea: an overview                                                                                                                                                                                                    | review |
| Samuel 2014      | What nurses need to know about fecal microbiota transplantation: education, assessment, and care for children and young adults                                                                                                      | review |
| Kellermayer 2013 | Prospects and challenges for intestinal microbiome therapy in pediatric gastrointestinal disorders                                                                                                                                  | review |
| Davidovics 2013  | Fecal transplantation: re-discovering the value of stool                                                                                                                                                                            | review |
| Kahn 2012        | Fecal bacteriotherapy for ulcerative colitis: patients are ready, are we?                                                                                                                                                           | review |
| Brandt 2011      | Fecal microbiota transplantation for recurrent clostridium difficile infection                                                                                                                                                      | review |
| Slattery 2016    | The Significance of the Enteric Microbiome on the Development of Childhood Disease: A Review of Prebiotic and Probiotic Therapies in Disorders of Childhood                                                                         | review |
| McFarland 2016   | Comparison of pediatric and adult antibiotic-associated diarrhea and Clostridium difficile infections                                                                                                                               | review |
| Warner 2018      | he contribution of the gut microbiome to neurodevelopment and neuropsychiatric disorders                                                                                                                                            | review |
| Fischer 2019     | Recent research on fecal microbiota transplantation in inflammatory bowel disease patients                                                                                                                                          | review |
| No authors 2014  | CRITICAL VIEWS IN GASTROENTEROLOGY & HEPATOLOGY: Fecal Microbiota Transplantation: Where Is It Leading?                                                                                                                             | review |
| No authors 2014  | CRITICAL VIEWS IN GASTROENTEROLOGY & HEPATOLOGY: Fecal Microbiota Transplantation: Where Is It Leading?                                                                                                                             | review |
| Gersten 2021     | Fecal matter transplant and nursing care: Combating clostridioides difficile infections                                                                                                                                             | review |
| Adams 2022       | Community-acquired clostridioides difficile cases in children on the rise: Increase in pediatric cases of C difficile is linked to use of broad-spectrum antibiotics, recurrent infections, and a growth in highly virulent strains | review |
| Noor 2018        | Clostridium difficile infection in children                                                                                                                                                                                         | review |
| Schutze 2013     | Clostridium difficile infection in infants and children                                                                                                                                                                             | review |
| Herman 2022      | Could Candida Overgrowth Be Involved in the Pathophysiology of Autism?                                                                                                                                                              | review |
| Tu 2021          | Treating autism spectrum disorder by intervening with gut microbiota                                                                                                                                                                | review |
| Zebrowska 2021   | Future Directions in Reducing Gastrointestinal Disorders in Children With ASD Using Fecal Microbiota Transplantation                                                                                                                | review |
| Adams 2019       | Microbiota transplant therapy and autism: lessons for the clinic                                                                                                                                                                    | review |
| Yang 2018        | Targeting gut microbiome: A novel and potential therapy for autism                                                                                                                                                                  | review |
| Jain 2021        | Gut Microbiome: A Potential Modifiable Risk Factor in Biliary Atresia                                                                                                                                                               | review |
| Vasilescu 2022   | Gut Dysbiosis and Clostridioides difficile Infection in Neonates and Adults                                                                                                                                                         | review |



|                       |                                                                                                                                                                 |        |
|-----------------------|-----------------------------------------------------------------------------------------------------------------------------------------------------------------|--------|
| Bernard 2021          | Fecal Microbiota Transplantation and Microbial Therapeutics for the Treatment of Clostridioides difficile Infection in Pediatric Patients                       | review |
| Conrad 2021           | Clostridioides difficile Infection in Pediatric Inflammatory Bowel Disease: A Clinician's Dilemma                                                               | review |
| Kociolek 2021         | Recent advances in Clostridioides difficile infection epidemiology, diagnosis and treatment in children                                                         | review |
| Cotter 2019           | An Infectious Diseases Perspective on Fecal Microbiota Transplantation for Clostridioides difficile Infection in Children                                       | review |
| Chen 2022             | Current and future applications of fecal microbiota transplantation for children                                                                                | review |
| Parnell 2021          | Pediatric Fecal Microbiota Transplantation in Recurrent Clostridioides Difficile                                                                                | review |
| Pane 2021             | Clinical Parasitology and Parasitome Maps as Old and New Tools to Improve Clinical Microbiomics                                                                 | review |
| MacLellan 2021        | Age-Matching in Pediatric Fecal Matter Transplants                                                                                                              | review |
| Masetti 2020          | The gut microbiome in pediatric patients undergoing allogeneic hematopoietic stem cell transplantation                                                          | review |
| Eindor-Abarbanel 2021 | Therapeutic Advances in Gut Microbiome Modulation in Patients with Inflammatory Bowel Disease from Pediatrics to Adulthood                                      | review |
| Yang 2021             | Advances in the Relationships Between Cow's Milk Protein Allergy and Gut Microbiota in Infants                                                                  | review |
| Cetkin 2021           | Adjunctive Treatment of Pediatric Adenoidal Hypertrophy: A Review                                                                                               | review |
| Popov 2021            | Microbiota-Immune Interactions in Ulcerative Colitis and Colitis Associated Cancer and Emerging Microbiota-Based Therapies                                      | review |
| Alam 2022             | Manipulating Microbiota to Treat Atopic Dermatitis: Functions and Therapies                                                                                     | review |
| Joachim 2022          | Fecal Microbiota Transfer (FMT) in Children and Adolescents – Review and statement by the GPGC microbiome working group                                         | review |
| Shehata 2022          | Microbiomes in physiology: insights into 21st-century global medical challenges                                                                                 | review |
| Krutova 2022          | How to: Clostridioides difficile infection in children                                                                                                          | review |
| Li 2022               | Targeting the Pulmonary Microbiota to Fight against Respiratory Diseases                                                                                        | review |
| Durovic 2021          | Cutting edges in Clostridioides difficile infections                                                                                                            | review |
| Oldenburg 2021        | The Microbiome in Childhood Acute Lymphoblastic Leukemia                                                                                                        | review |
| Zhu 2021              | Prospects for clinical applications of butyrate-producing bacteria                                                                                              | review |
| Fianchi 2021          | Nonalcoholic Fatty Liver Disease (NAFLD) as Model of Gut-Liver Axis Interaction: From Pathophysiology to Potential Target of Treatment for Personalized Therapy | review |
| Akutko 2021           | Probiotics, Prebiotics and Synbiotics in Inflammatory Bowel Diseases                                                                                            | review |
| Albuhairi 2021        | Biologics and Novel Therapies for Food Allergy                                                                                                                  | review |
| Cuna 2021             | Dynamics of the preterm gut microbiome in health and disease                                                                                                    | review |
| Rachid 2021           | The microbial origins of food allergy                                                                                                                           | review |
| Gomaa 2020            | Human gut microbiota/microbiome in health and diseases: a review                                                                                                | review |
| Ciprandi 2020         | Local Bacteriotherapy - a promising preventive tool in recurrent respiratory infections                                                                         | review |
| Giles 2020            | Microbiome in health and disease                                                                                                                                | review |

|                              |                                                                                                                                           |        |
|------------------------------|-------------------------------------------------------------------------------------------------------------------------------------------|--------|
| Thom 2020                    | Immune Modulatory Treatments for Autism Spectrum Disorder                                                                                 | review |
| Lim 2020                     | Engineering the Gut Microbiome for Treatment of Obesity: A Review of Current Understanding and Progress                                   | review |
| Schwartz 2020                | Understanding the impact of antibiotic perturbation on the human microbiome                                                               | review |
| Park 2020                    | Increasing incidence of inflammatory bowel disease in children and adolescents: significance of environmental factors                     | review |
| Stephen-Victor 2020          | Dietary and Microbial Determinants in Food Allergy                                                                                        | review |
| Yaghoubi 2020                | p28 Bacterial Peptide, as an Anticancer Agent                                                                                             | review |
| Bajinka 2020                 | Extrinsic factors influencing gut microbes, the immediate consequences and restoring eubiosis                                             | review |
| Nance 2020                   | The Role of the Microbiome in Food Allergy: A Review                                                                                      | review |
| Gnocchi 2020                 | Updated Management Guidelines for Clostridioides difficile in Paediatrics                                                                 | review |
| Ebrahimzadeh Leylabadlo 2020 | Non-alcoholic fatty liver diseases: from role of gut microbiota to microbial-based therapies                                              | review |
| Southwell 2020               | Treatment of childhood constipation: a synthesis of systematic reviews and meta-analyses                                                  | review |
| Olesen 2020                  | Global disparities in faecal microbiota transplantation research                                                                          | review |
| Mounsey 2020                 | Clostridioides difficile Infection: Update on Management                                                                                  | review |
| Harkins 2020                 | Manipulating the Human Microbiome to Manage Disease                                                                                       | review |
| Pironi 2019                  | Management of the Patient with Chronic Intestinal Pseudo-Obstruction and Intestinal Failure                                               | review |
| Ersoz 2019                   | The Role of Gut Microbiota in Autism Spectrum Disorder                                                                                    | review |
| Gurram 2019                  | Fecal microbiota transplantation in children: current concepts                                                                            | review |
| Kujiper 2019                 | Treatment of (recurrent) Clostridioides difficile Infections in Children and Adults                                                       | review |
| Wardill 2019                 | Adjunctive fecal microbiota transplantation in supportive oncology: Emerging indications and considerations in immunocompromised patients | review |
| Campbell 2019                | An Updated Review of Clostridium difficile Treatment in Pediatrics                                                                        | review |
| Dalzell 2019                 | Paediatric inflammatory bowel disease: review with a focus on practice in low- to middle-income countries                                 | review |
| Lauro 2019                   | Short bowel syndrome in children and adults: from rehabilitation to transplantation                                                       | review |
| Nobili 2019                  | Fighting Fatty Liver Diseases with Nutritional Interventions, Probiotics, Symbiotics, and Fecal Microbiota Transplantation (FMT)          | review |
| Gupta 2018                   | Diagnosis and Treatment of Clostridium difficile Infection                                                                                | review |
| Huang 2018                   | Microbial treatment in chronic constipation                                                                                               | review |
| Schaffler 2018               | Clostridium difficile - From Colonization to Infection                                                                                    | review |
| Quraishi 2017                | Faecal transplantation for IBD management-pitfalls and promises                                                                           | review |
| Clayton 2017                 | Recent Issues in Pediatric Clostridium difficile Infection                                                                                | review |
| Walker 2017                  | The importance of appropriate initial bacterial colonization of the intestine in newborn, child, and adult health                         | review |

|                        |                                                                                                                                                                                |                                     |
|------------------------|--------------------------------------------------------------------------------------------------------------------------------------------------------------------------------|-------------------------------------|
| Guariso 2017           | Treating children with inflammatory bowel disease: Current and new perspectives                                                                                                | review                              |
| Chen 2017              | Fecal microbiota transplantation for recurrent clostridium difficile infection in children                                                                                     | review                              |
| Al Khodor 2017         | Gut microbiome and kidney disease: a bidirectional relationship                                                                                                                | review                              |
| Martin 2017            | Gut-Brain Axis and Behavior                                                                                                                                                    | review                              |
| Wang 2016              | Fecal microbial transplant for the treatment of pediatric inflammatory bowel disease                                                                                           | review                              |
| Qiao 2016              | Therapeutic modulation of gut microbiota in inflammatory bowel disease: More questions to be answered                                                                          | review                              |
| Grady 2016             | Microbial therapeutic interventions                                                                                                                                            | review                              |
| Li 2016                | The gut microbiota: A treasure for human health                                                                                                                                | review                              |
| Hourigan 2016          | Fecal microbiota transplantation in children: a brief review                                                                                                                   | review                              |
| Vieira 2016            | New insights into therapeutic strategies for gut microbiota modulation in inflammatory diseases                                                                                | review                              |
| Landman 2016           | [Gut microbiota: Description, role and pathophysiologic implications]                                                                                                          | review                              |
| Grigorescu 2016        | IMPLICATION OF GUT MICROBIOTA IN DIABETES MELLITUS AND OBESITY                                                                                                                 | review                              |
| Fuentes 2016           | How to Manipulate the Microbiota: Fecal Microbiota Transplantation                                                                                                             | review                              |
| Dinh 2015              | Current treatment and epidemiology of Clostridium difficile infections                                                                                                         | review                              |
| Pawasarat 2021         | Constipation in pediatrics: A clinical review                                                                                                                                  | Review                              |
| Nicholson 2021         | Current Challenges in Fecal Microbiota Transplantation for Clostridioides difficile Infection in Children                                                                      | Review                              |
| Yang 2020              | Effects of gut microbial-based treatments on gut microbiota, behavioral symptoms, and gastrointestinal symptoms in children with autism spectrum disorder: A systematic review | Systematic review                   |
| Martinez-Gonzalez 2020 | Prebiotics, probiotics and fecal microbiota transplantation in autism: A systematic review                                                                                     | Systematic review                   |
| Sharpton 2019          | Gut microbiome-targeted therapies in nonalcoholic fatty liver disease: a systematic review, meta-analysis, and meta-regression                                                 | Systematic review                   |
| Iqbal 2018             | Safety and efficacy of encapsulated fecal microbiota transplantation for recurrent Clostridium difficile infection: a systematic review                                        | Systematic review                   |
| Sha 2014               | Systematic review: faecal microbiota transplantation therapy for digestive and nondigestive disorders in adults and children                                                   | Systematic review                   |
| Tariq 2021             | Outcomes of Fecal Microbiota Transplantation for C. difficile Infection in Inflammatory Bowel Disease: A Systematic Review and Meta-analysis                                   | Systematic review and meta analysis |
| Yang 2020              | Effects of gut microbial-based treatments on gut microbiota, behavioral symptoms, and gastrointestinal symptoms in children with autism spectrum disorder: A systematic review | Systematic review and meta analysis |
